# Supplementary material
Source: PubMed Central journal article supplement (PMC5905396)
Supplement: en.2018-00117.sf1.pdf [file en.2018-00117.sf1.pdf]

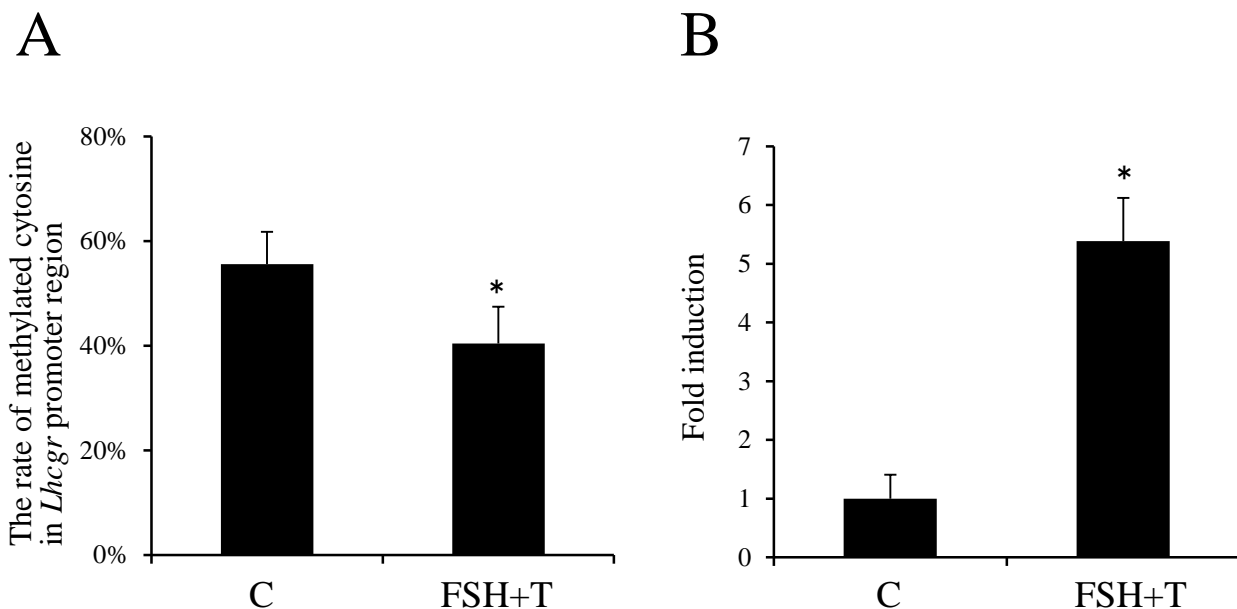

**Figure S1. The effect of *de novo* retinoic acid synthesis in granulosa cells by FSH+testosterone in the presence of serum**

A; The changes in the methylation levels of *Lhcgr* promoter region in granulosa cells, cultured in the medium supplemented with FSH+T in the presence of serum. Granulosa cells were collected from ovaries of immature mice, after treating with eCG for 6 h, and were cultured in the medium supplemented with FSH+T in the presence of 1 % FCS. Sequence analysis was performed more than 5 colonies for each treatment of three replicates. Values are mean  $\pm$  SEM. C; Granulosa cells were cultured without any hormones. FSH+T; Granulosa cells were cultured with FSH (50 ng/ml) and testosterone (10 ng/ml). \*; Significant differences are observed compared with control ( $p < 0.05$ ).

B; The changes in the expression of *Lhcgr* mRNA in granulosa cells, cultured in the medium supplemented with FSH+T in the presence of serum. Granulosa cells were collected from ovaries of immature mice, after treating with eCG for 6 h, and were cultured in the medium supplemented with FSH+T in the presence of 1 % FCS. Values are mean  $\pm$  SEM of three replicates. Levels of mRNA were normalized to that of *L19*. \*; Significant differences were observed compared with control ( $p < 0.05$ ).

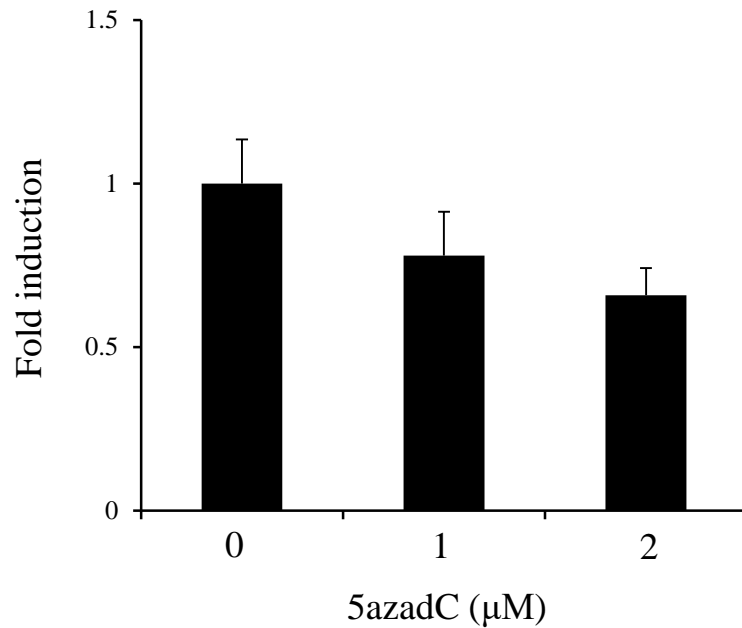

**Figure S2. The effect of the methyltransferase inhibitor (5azadC) on the expression of *Lhcgr* in granulosa cells**

The effect of methyltransferase inhibitor (5-Aza-2'-deoxycytidine; 5azadC) on the expression of *Lhcgr* in granulosa cells during follicular development. Granulosa cells were collected from ovaries of immature mice, after treating with eCG for 6 h, and were cultured in the absence of FCS for 48 h. Levels of mRNA were normalized to that of *L19*. Values are mean  $\pm$  SEM of three replicates.
